# Supplementary material for: Numerical modelling of relative contribution of planetary waves to the atmospheric circulation
Source: Copernicus journal article supplement (doi:10.5194/acp-23-4105-2023), 2023-04-05
Supplement: Supplementary file 1 [file acp-23-4105-2023-supplement.pdf]

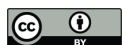

*Supplement of*

## **Numerical modelling of relative contribution of planetary waves to the atmospheric circulation**

**Andrey V. Koval et al.**

*Correspondence to:* Eugene V. Rozanov (eugene.rozanov@pmodwrc.ch)

The copyright of individual parts of the supplement might differ from the article licence.

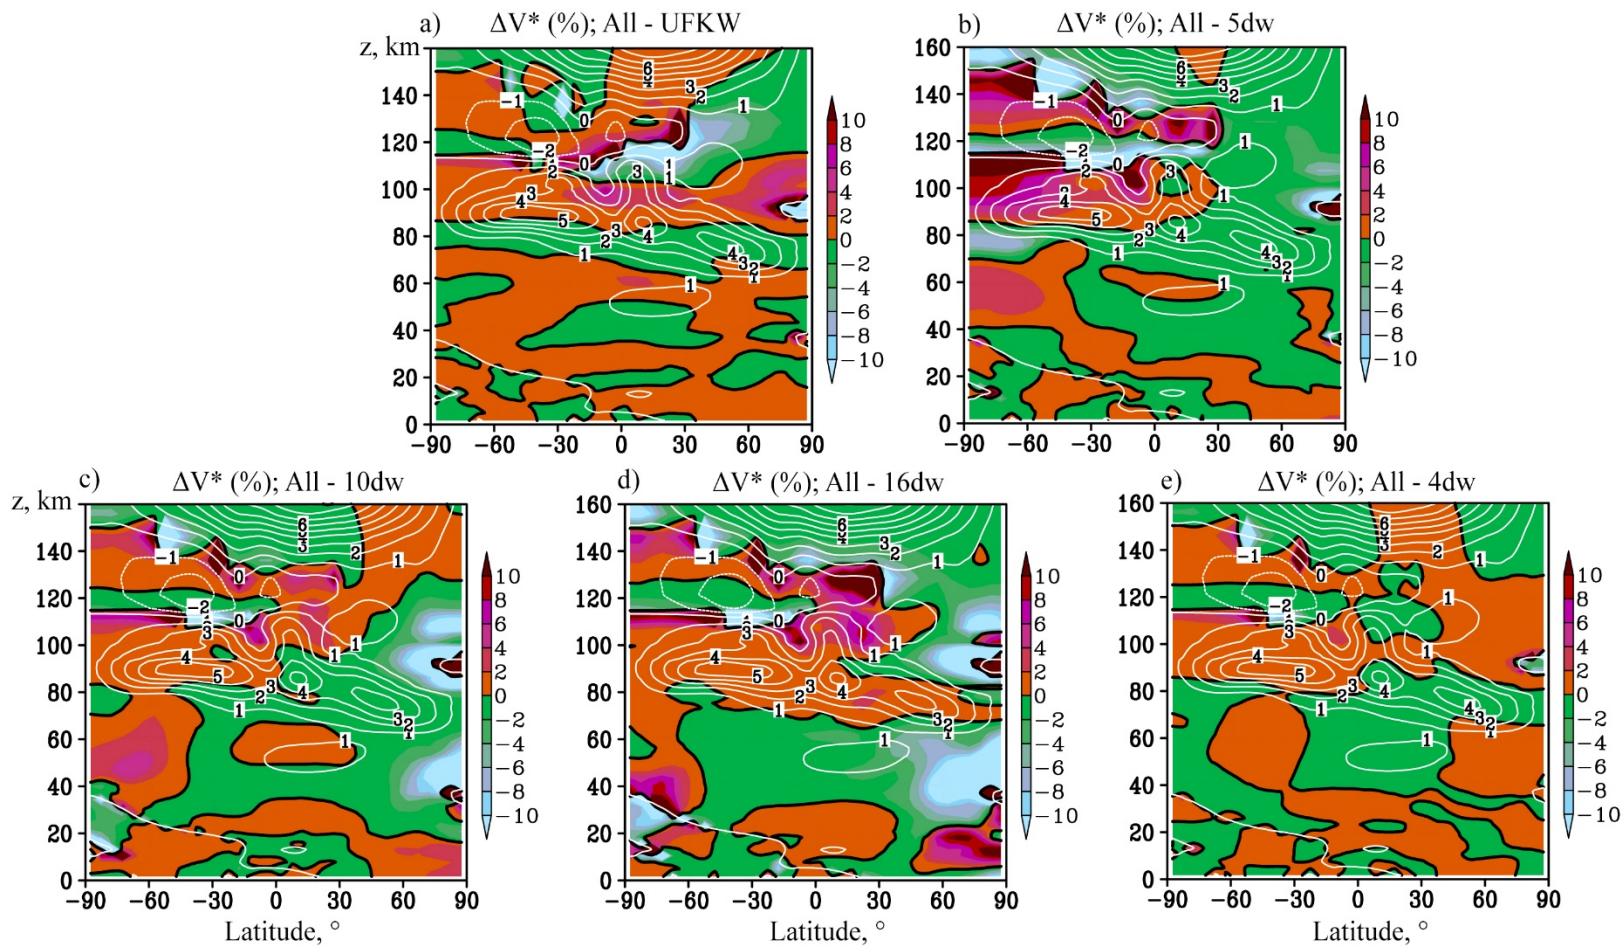

Figure S1. Relative changes in meridional RMC component ( $V^*$ , percents) due to switching off sources of PW: UFKW, 5-, 10-, 16- and 4-day waves (a-e, respectively). Contours show  $V^*$  (interval 1 m/s).

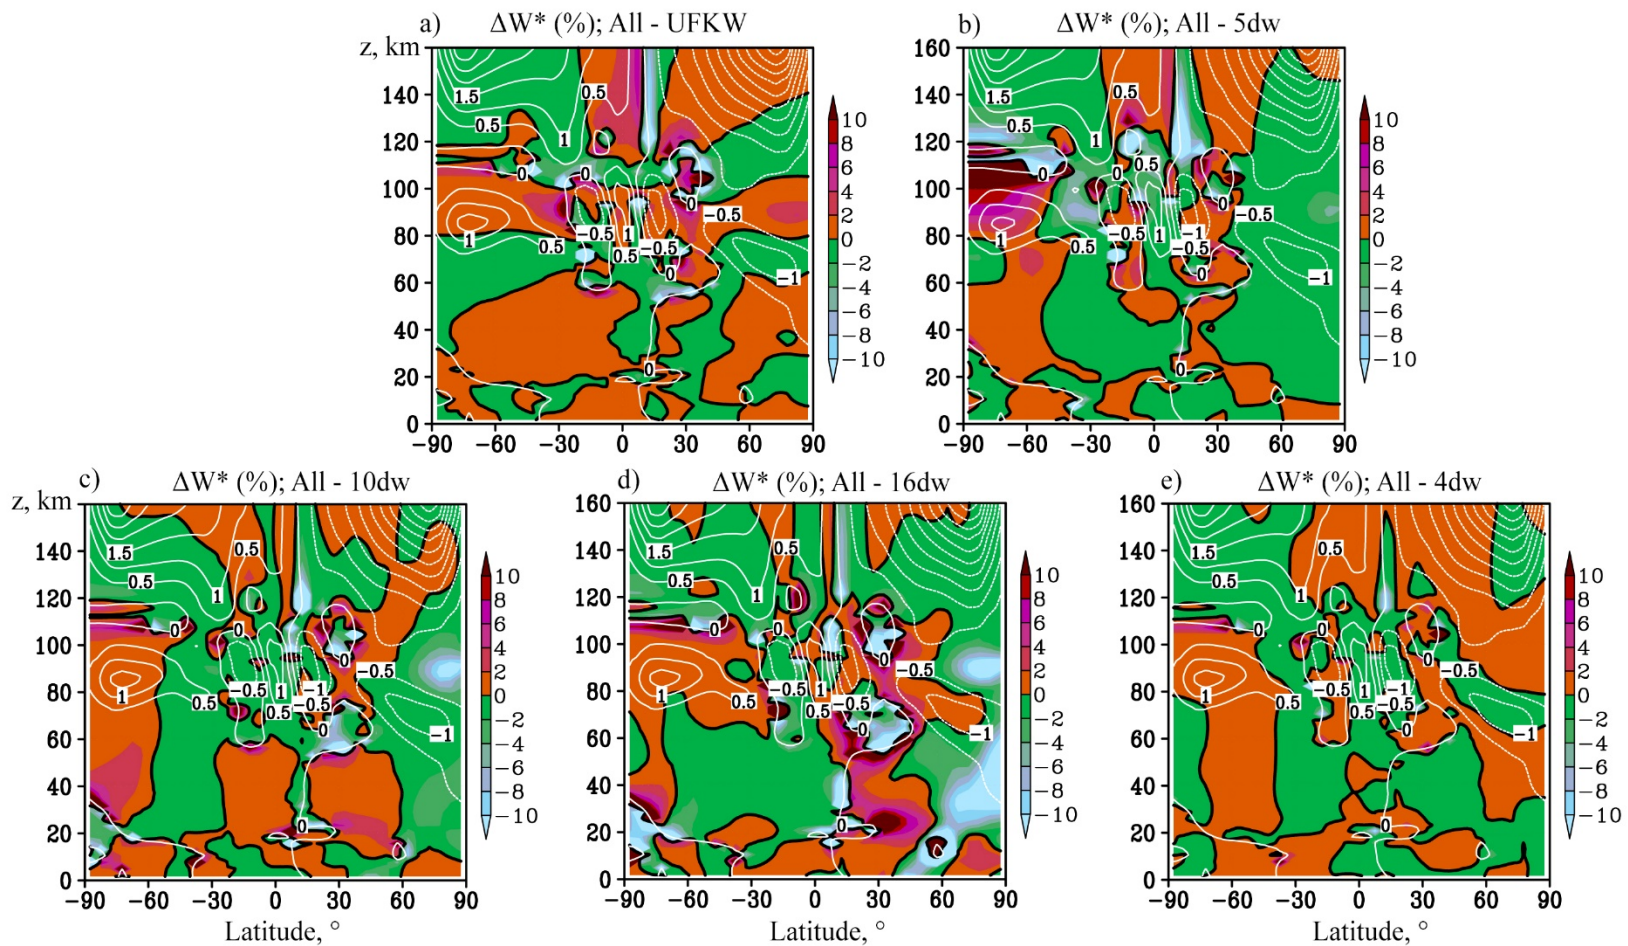

**Figure S2.** Relative changes in vertical RMC component ( $W^*$ , percents) due to switching off sources of PW: UFKW, 5-, 10-, 16- and 4-day waves (a-e, respectively). Contours show  $W^*$  (interval 0.5 cm/s).

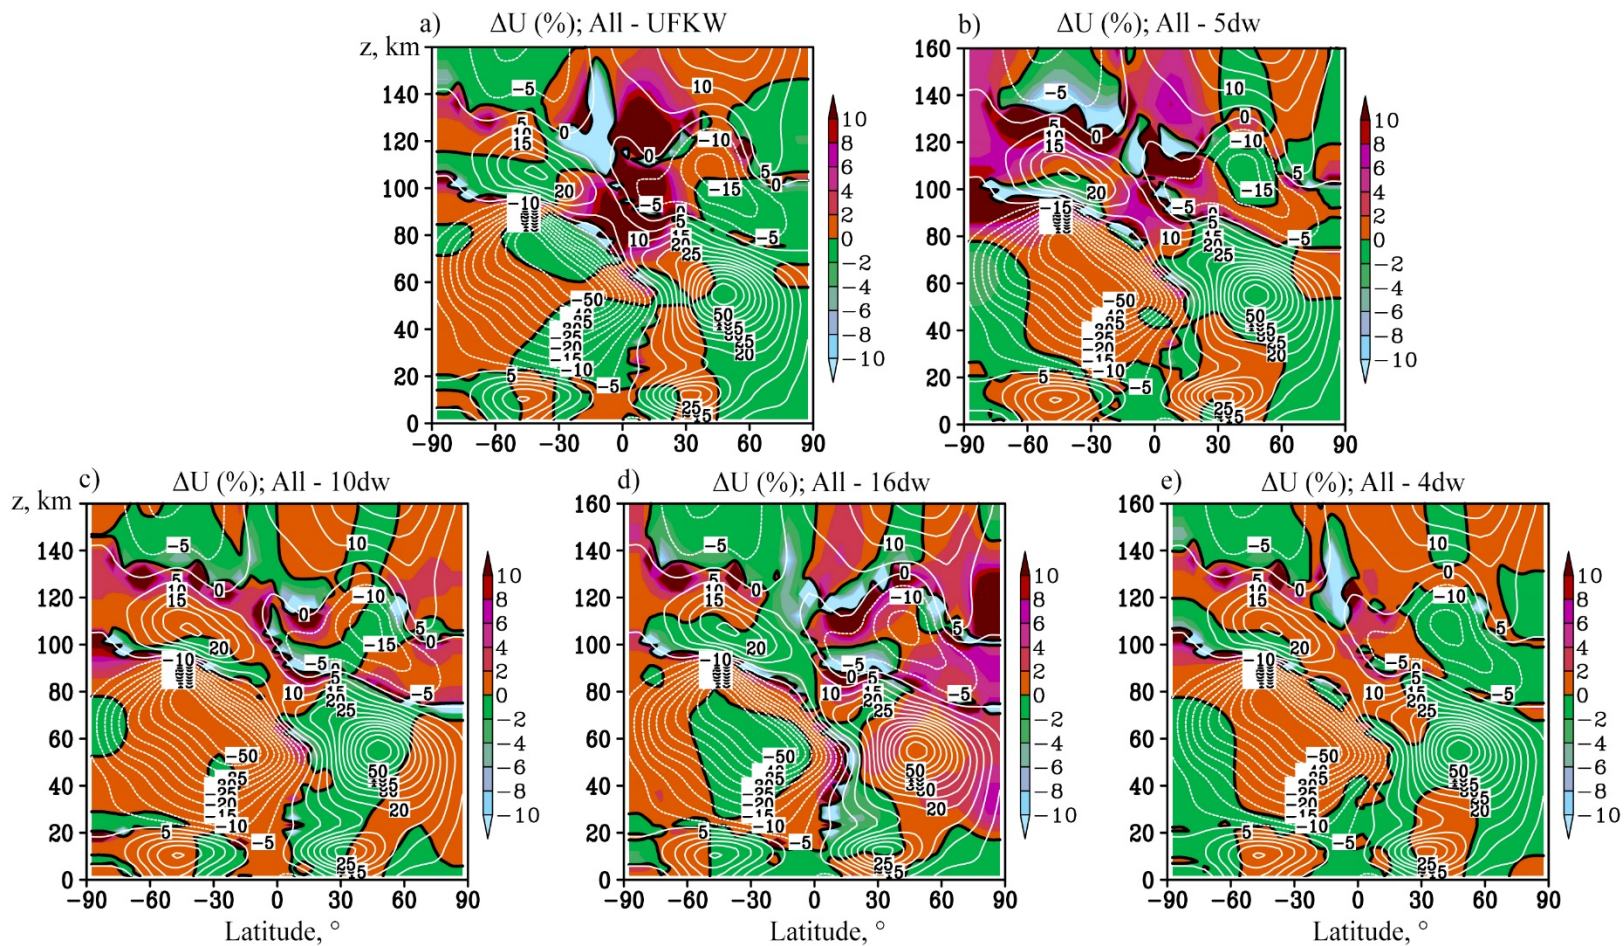

**Figure S3. Relative changes in zonal-mean zonal wind (U, percents) due to switching off sources of PW: UFKW, 5-, 10-, 16- and 4-day waves (a-e, respectively). Contours show U (interval 5 m/s).**
